# Supplementary material for: Relative Citation Ratio (RCR): A New Metric That Uses Citation Rates to Measure Influence at the Article Level
Source: PLoS Biol. 2016 Sep 6;14(9):e1002541. doi: 10.1371/journal.pbio.1002541 (PMC5012559; doi:10.1371/journal.pbio.1002541)
Supplement: S2 Table — One of the criticisms about impact factor is that it uses the mean, rather than median, of a skewed distribution [78]; for RCR, QR can be used to benchmark articles to the median citation performance in the benchmark group, rather than the mean. (XLSX) [file pbio.1002541.s012.xlsx]

## Sheet: Sheet1
Year	Slope (OLS)	Intercept (OLS)	Slope (QR)	Intercept (QR)
2003	0.497	1.947	0.355	0.87
2004	0.531	1.877	0.344	1.09
2005	0.593	1.645	0.384	0.914
2006	0.608	1.471	0.385	0.967
2007	0.643	1.411	0.381	1.091
2008	0.772	0.711	0.446	0.681
2009	0.768	0.704	0.469	0.542
2010	0.739	0.657	0.49	0.156
2011	0.78	0.12	0.498	0
