# Supplementary material for: Relative Citation Ratio (RCR): A New Metric That Uses Citation Rates to Measure Influence at the Article Level
Source: PLoS Biol. 2016 Sep 6;14(9):e1002541. doi: 10.1371/journal.pbio.1002541 (PMC5012559; doi:10.1371/journal.pbio.1002541)
Supplement: S3 Table — (XLSX) [file pbio.1002541.s013.xlsx]

## Sheet: Sheet1
Methods compared	Pearson r
Cited ~ Citing	0.928529
Cited ~ Co-cited	0.95274
Citing ~ Co-Cited	0.959203
